# Supplementary material for: Effect of Ga substitution with Al in ZSM-5 zeolite in methanethiol-to-hydrocarbon conversion
Source: Royal Society of Chemistry journal article supplement (doi:10.1039/d3ra01852k), 2023-01-01

Supporting data 1 Pore size distribution in H-[Ga]-ZSM-5 catalysts.

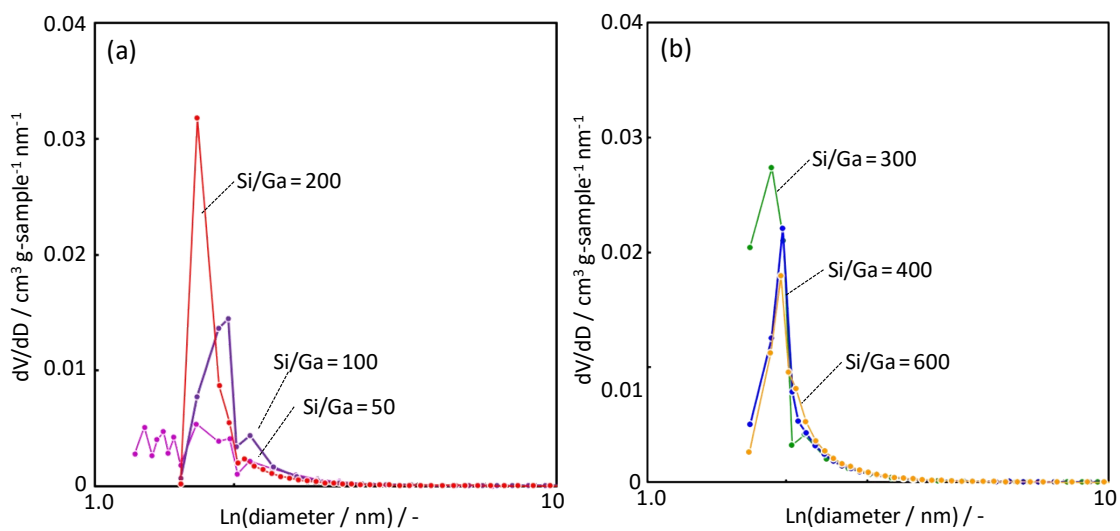

Supplement: d3ra01852k1.pdf [file d3ra01852k1.pdf]
